# Supplementary material for: Magnetic and fluorescent nanohybrids with surface imprinting silica as a dual-functional sensing platform for ratiometric fluorescence detection of phycoerythrin
Source: Royal Society of Chemistry journal article supplement (doi:10.1039/c9tc03517f), 2019-01-01
Supplement: c9tc03517f1.pdf [file c9tc03517f1.pdf]

## Electronic Supplementary Information

# Magnetic and fluorescent nanohybrids with surface imprinting silica as dual-functional sensing platform for ratiometric fluorescence detection of phycoerythrin

Yongxin Fu,<sup>1</sup> Hui Jin,<sup>1</sup> Xiangning Bu and Rijun Gui 

College of Chemistry and Chemical Engineering, Intellectual Property Research Institute, Qingdao University, Shandong 266071, P.R.

China. E-mail address: [guirijun@163.com](mailto:guirijun@163.com); [guirijun@qdu.edu.cn](mailto:guirijun@qdu.edu.cn). Tel./fax: +86 532 85953981

<sup>1</sup> These authors have the equivalent contribution to this work.

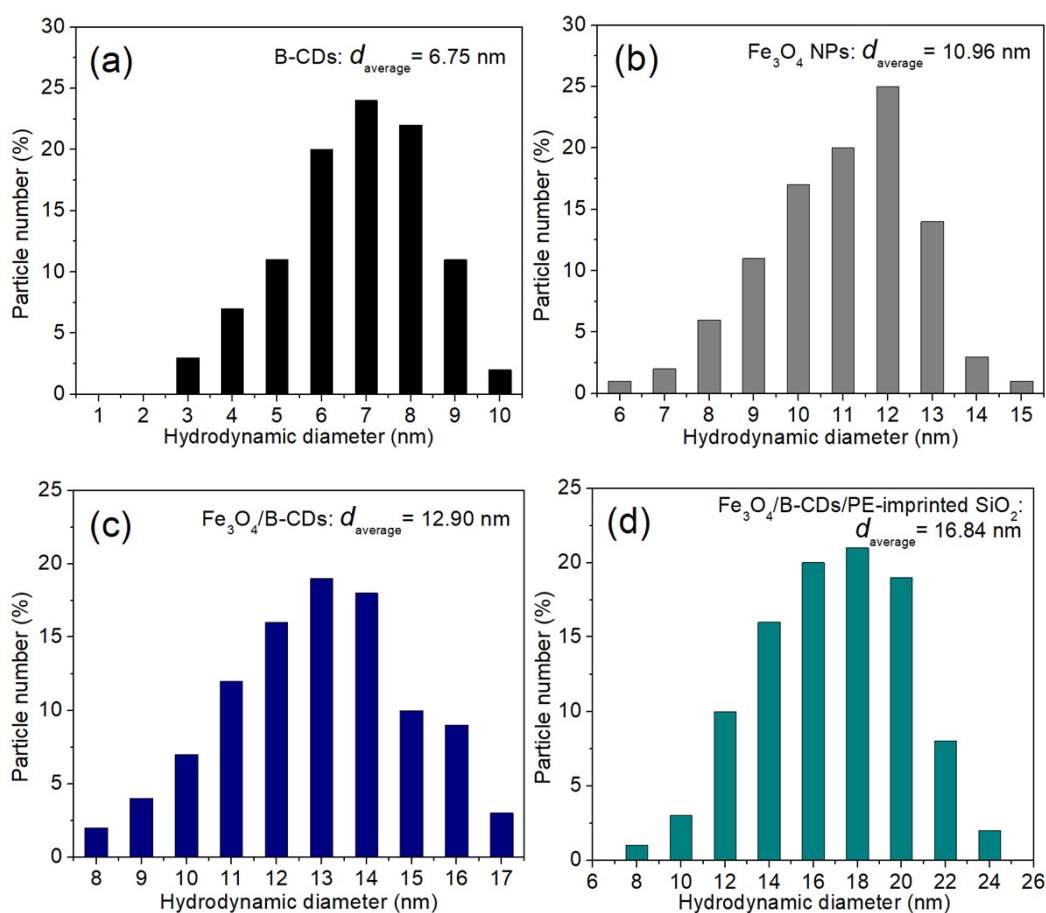

**Fig. S1.** Hydrodynamic diameter distributions of the prepared B-CDs, magnetic  $\text{Fe}_3\text{O}_4$  NPs,  $\text{Fe}_3\text{O}_4/\text{B-CDs}$  complex and  $\text{Fe}_3\text{O}_4/\text{B-CDs}/\text{PE-imprinted SiO}_2$  nanohybrids and the corresponding average diameters measured by DLS.

## Electronic Supplementary Information

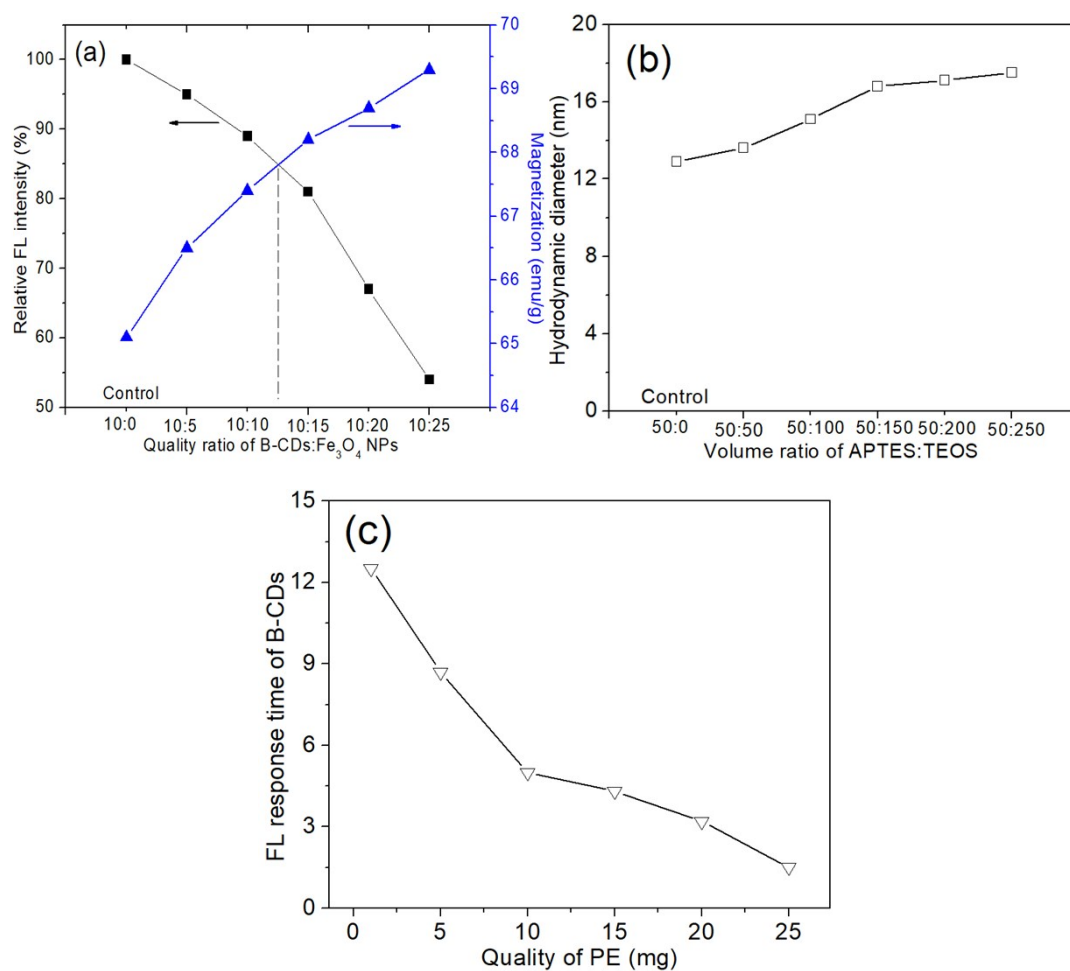

**Fig. S2.** (a) Effects of quality ratio of B-CDs:  $\text{Fe}_3\text{O}_4$  NPs on relative FL intensities of B-CDs and magnetization intensities of  $\text{Fe}_3\text{O}_4$  NPs in the prepared nanohybrids. (b) Effects of volume ratio of volume ratio of APTES: TEOS on hydrodynamic diameter of the MIP-based nanohybrids measured by DLS. (c) Effects of quality of PE on the FL response time of B-CDs in the MIP-based nanohybrids.
